# Supplementary material for: Impaired Fasting Glucose Is the Major Determinant of the 20‐Year Mortality Risk Associated With Metabolic Syndrome in Nondiabetic Patients With Stable Coronary Artery Disease
Source: PubMed Central journal article supplement — J Am Heart Assoc. 2017 Oct 27;6(11):e006609. doi: 10.1161/JAHA.117.006609 (PMC5721758; doi:10.1161/jaha.117.006609), 2017-10-27
Supplement: JAH3-6-e006609-s001.pdf [file JAH3-6-e006609-s001.pdf]

## SUPPLEMENTAL MATERIAL

**Table S1. Independent all-cause mortality risk predictors in non-diabetic patients with stable CAD.**

|                            | Adjusted HR | 95% CI             | P-Value          |
|----------------------------|-------------|--------------------|------------------|
| <b>IFG vs. no IFG</b>      | <b>1.22</b> | <b>1.14 – 1.31</b> | <b>&lt;0.001</b> |
| BMI > 30 kg/m <sup>2</sup> | 1.19        | 1.02 – 1.24        | 0.01             |
| Low HDL <sup>#</sup>       | 1.08        | 0.99 – 1.20        | 0.09             |
| Elevated BP <sup>@</sup>   | 1.02        | 0.95 – 1.10        | 0.55             |
| TG > 150 mg/dL             | 1.03        | 0.96 – 1.11        | 0.40             |
| BMI > 30 kg/m <sup>2</sup> | 1.19        | 1.02 – 1.24        | 0.01             |
| HTN                        | 1.09        | 1.01 – 1.17        | 0.03             |
| Past MI                    | 1.46        | 1.34 – 1.60        | <0.001           |
| NYHA ≥ 3                   | 1.19        | 1.01 – 1.39        | 0.03             |
| Creatinine > 1.5 mg/dL     | 1.60        | 1.36 – 1.88        | <0.001           |
| Age > 60 years             | 1.08        | 1.07 -1.09         | <0.001           |
| Male sex                   | 1.21        | 1.07 – 1.35        | 0.001            |
| COPD                       | 1.27        | 1.05 – 1.54        | 0.01             |
| Past CVA                   | 1.19        | 0.86 – 1.65        | 0.30             |

BMI = body mass index; BP = blood pressure; COPD = chronic obstructive pulmonary disease; CVA = cerebral vascular accident; HDL = high-density lipoprotein; HTN = hypertension; IFG = impaired fasting glucose; MI = myocardial infarction; NYHA = New York Heart Association; TG = triglycerides.

<sup>#</sup> Low HDL defined as HDL < 40 mg/dL in males and HDL < 50 mg/dL in females.

<sup>@</sup> Systolic blood-pressure > 130 (mmHg) or/and diastolic blood-pressure > 85 (mmHg)
